# Supplementary material
Source: PubMed Central journal article supplement (PMC5690841)
Supplement: NIHMS906406-supplement-supplement_1.pdf [file NIHMS906406-supplement-supplement_1.pdf]

Figure 3 (online only). (A) Quantile-quantile (QQ) plot for NAS (NAS  $\leq 4$  to NAS  $>4$ ), grouped using an additive genetic model. The  $-\log_{10}$  (P value) of observed. (B) QQ plot for fibrosis, grouped using an additive genetic model. The  $-\log_{10}$  (P value) of observed.

A.

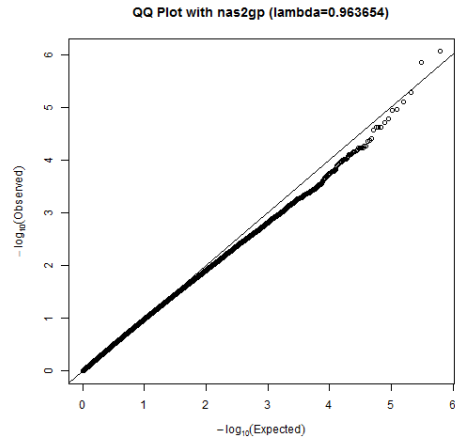

B.

**Comment [U10]:** AUTHOR: Two different versions of Figure captions were provided and the one in the manuscript has been used. Please check and confirm that it is correct.

GWAS in Hispanic boys with NAFLD

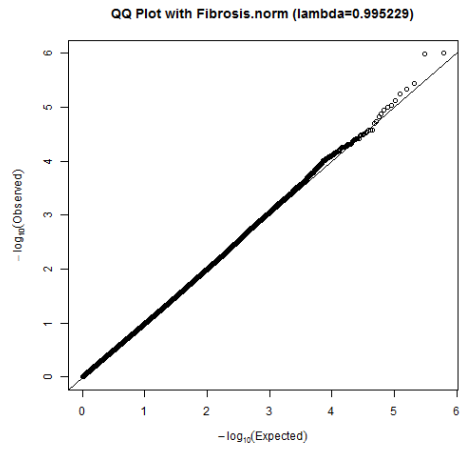

(Table 3, online). Top SNPs from GWAS Logistic Analysis of NAS (binary trait NAS ≤4 to NAS >4), additive model. Chromosome (Chr), Single Nucleotide Polymorphism (SNP), Minor Allele Frequency (MAF).

| SNP                        | Chr | Base Pair | Gene    | Minor | Major | MAF   | P- value                |
|----------------------------|-----|-----------|---------|-------|-------|-------|-------------------------|
| <a href="#">rs11166927</a> | 8   | 140796420 | TRAPPC9 | C     | T     | 0.295 | 8.66 x 10 <sup>-7</sup> |
| <a href="#">rs11166926</a> | 8   | 140795752 | TRAPPC9 | G     | A     | 0.293 | 1.40 x 10 <sup>-6</sup> |
| <a href="#">rs2242181</a>  | 8   | 140819819 | TRAPPC9 | T     | C     | 0.310 | 5.33 x 10 <sup>-6</sup> |
| <a href="#">rs7836476</a>  | 8   | 140819819 | TRAPPC9 | T     | C     | 0.312 | 7.91 x 10 <sup>-6</sup> |

(Table 4, online). SNPs discovered in Hispanic boys in the context of SNPs previously published in adult cohorts. Single Nucleotide Polymorphism (SNP), Minor Allele Frequency (MAF), NAFLD Activity Score (NAS). [Additional variants for PNPLA3 tested, data not shown.]

| Variant    | Proxy SNP  | D' | R <sup>2</sup> | Trait    | Chr | Gene    | MAF  | P- NAS | P- Fibrosis |
|------------|------------|----|----------------|----------|-----|---------|------|--------|-------------|
| rs2896019  |            |    |                | Fat      | 22  | PNPLA3  | 0.27 | 0.11   | 0.12        |
| rs381062   |            |    |                | Fat      | 22  | PNPLA3  | 0.07 | 0.14   | 0.25        |
| rs5764034  |            |    |                | Fibrosis | 22  | PNPLA3  | 0.11 | 0.11   | 0.010       |
| rs2499604  |            |    |                | ALT      | 1   | RYR2    | 0.41 | 0.81   | 0.003       |
| rs343062   | rs2160621  | 1  | 0.38           | Fibrosis | 7   | PDGF-a  | 0.31 | 0.68   | 0.4         |
| rs2228603  | rs10401193 | 1  | 0.36           | Fat      | 19  | NCAN    | 0.38 | 0.04   | 0.013       |
| rs780094   |            |    |                | Fat      | 2   | GCKR    | 0.41 | 0.22   | 0.69        |
| rs12137855 |            |    |                | Fat      | 1   | LYPLAL1 | 0.36 | 0.77   | 0.98        |
| rs222054   | rs12512631 | 1  | 0.323          | Fat      | 4   | GC      | 0.42 | 0.60   | 0.75        |
| rs7324845  | rs4941543  | 1  | 0.94           | Fat      | 13  | LCP1    | 0.43 | 0.04   | 0.7         |

|            |  |  |  |     |    |         |      |      |       |
|------------|--|--|--|-----|----|---------|------|------|-------|
| rs11864146 |  |  |  | Fat | 16 | SLC38A8 | 0.15 | 0.23 | 0.65  |
| rs3761472  |  |  |  | Fat | 22 | SAMM50  | 0.45 | 0.69 | 0.18  |
| rs5764455  |  |  |  | Fat | 22 | PARVB   | 0.48 | 0.1  | 0.62  |
| rs2074301  |  |  |  | Fat | 19 | TM6SF2  | 0.39 | 0.13 | 0.02  |
| rs2074303  |  |  |  | Fat | 19 | TM6SF2  | 0.48 | 0.15 | 0.003 |
